# Supplementary material for: Hearing difficulty is linked to Alzheimer’s disease by common genetic vulnerability, not shared genetic architecture
Source: PubMed Central journal article supplement (PMC8298411; doi:10.1038/s41514-021-00069-4), 2021-07-22
Supplement: 41514_2021_69_MOESM1_ESM.pdf [file 41514_2021_69_MOESM1_ESM.pdf]

1 **Hearing difficulty is linked to Alzheimer’s disease by common**  
2 **genetic vulnerability, not shared genetic architecture**

3 Fatin N. Zainul Abidin<sup>a,b</sup>, Helena R. R. Wells<sup>a,c</sup>, Andre Altmann<sup>b\*</sup>, Sally J. Dawson<sup>a\*</sup>

4  
5 a UCL Ear Institute, University College London, London, UK.

6 b Centre for Medical Image Computing, Department of Medical Physics and Biomedical  
7 Engineering, University College London, London, UK.

8 c Department of Twin Research and Genetic Epidemiology, King’s College London,  
9 London, UK.

10 \* Joint senior authors

11  
12 Corresponding author at:

13 UCL Ear Institute, University College London, 332 Gray’s Inn Road, WC1X 8EE, London,  
14 UK.

15 Tel: +44 (0)20 7679 8935

16 E-mail address: sally.dawson@ucl.ac.uk (Sally Dawson)

17  
18 **Supplementary Tables and Data**

|    |                        |                                                          |      |
|----|------------------------|----------------------------------------------------------|------|
| 19 | Supplementary Figure 1 | Manhattan plots displaying GWAS results for HDiff and AD |      |
| 20 |                        |                                                          |      |
| 21 |                        |                                                          | 2    |
| 22 | Supplementary Table 1  | Two-sample bidirectional Mendelian randomization         |      |
| 23 |                        | of HDiff and AD                                          | 3    |
| 24 | Supplementary Table 2  | Shared causal traits for HDiff and AD                    | 4    |
| 25 | Supplementary Table 3  | Characteristics of genetic variants as instruments       |      |
| 26 |                        | from glutamine, gamma-glutamylglutamine, and citrate     | 5    |
| 27 | Supplementary Data 1   | 34 instruments (HDiff SNPs) for Mendelian randomisation  |      |
| 28 |                        | analysis of HDiff as exposure                            | .xls |
| 29 | Supplementary Data 2   | 11 instruments (AD SNPs) for Mendelian randomisation     |      |
| 30 |                        | analysis of AD as exposure and HDiff as outcome          | .xls |
| 31 | Supplementary Data 3   | 379 MR-base instruments association with HDiff and AD    | .xls |

32 (a)

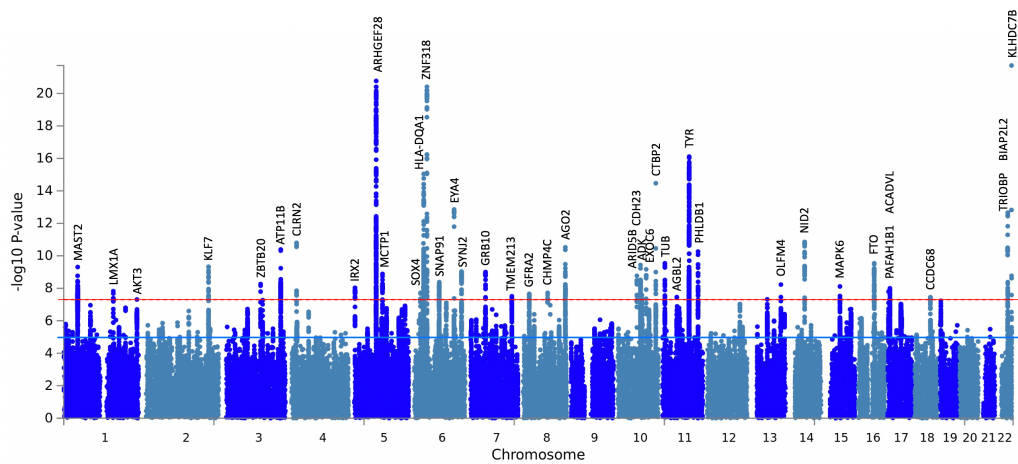

33 (b)  
34

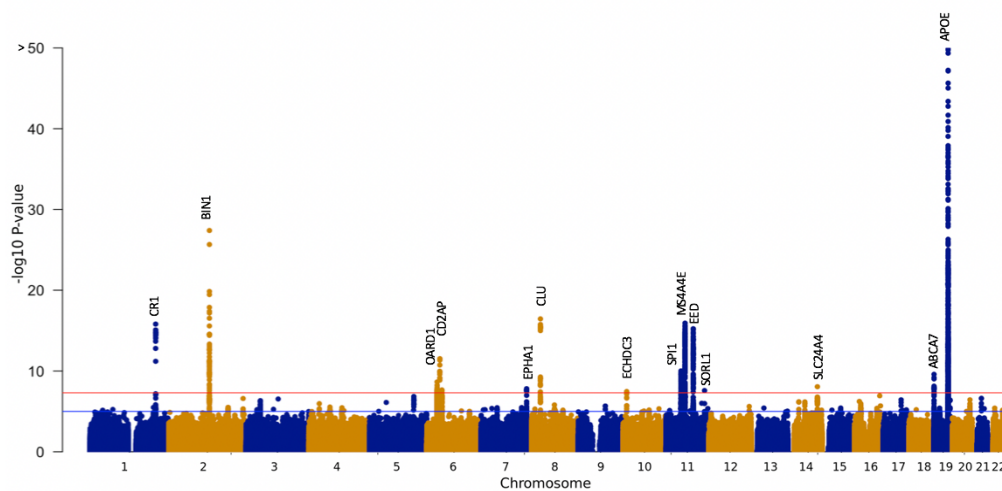

35  
36 **Supplementary Figure 1| Manhattan plots displaying GWAS results for (a) UKBB**  
37 **Hearing difficulty (*HDiff*), and (b) Stage 1 IGAP late-onset Alzheimer's disease (*AD*)**  
38 **phenotypes.** The Manhattan plots display the P-values of all SNPs tested in discovery  
39 analysis from (Kunkle et al., 2019; Wells et al., 2019). The threshold for genome-wide  
40 significance (P-value <5e-08) is indicated by a red solid horizontal line and the genome-wide  
41 suggestive threshold (P-value <1e-05) is indicated by a blue horizontal solid line. Loci that  
42 reached genome-wide significance are annotated with gene symbol. The inflation factors,  $\lambda$   
43 for *HDiff* and *AD* are 1.31 and 1.09 respectively.

44  
45  
46  
47  
48  
49  
50  
51

52 **Supplementary Table 1|**

53 Two-sample bidirectional Mendelian randomization of Hearing difficulty and Alzheimer's  
 54 disease.

55

| 56 | <b>Exposure</b> | <b>Outcome</b> | <b>MR method</b> | <b>nSNP</b> | <b>Beta</b> | <b>SE</b> | <b>P-value</b> |
|----|-----------------|----------------|------------------|-------------|-------------|-----------|----------------|
| 57 | <i>HDiff</i>    | <i>AD</i>      | IVW              | 34          | -0.261      | 0.304     | 0.390          |
| 58 |                 |                | MR Egger         | 34          | 0.042       | 1.362     | 0.975          |
| 59 |                 |                | Simple Mode      | 34          | -0.479      | 0.816     | 0.561          |
| 60 |                 |                | Weighted Median  | 34          | -0.464      | 0.424     | 0.274          |
| 61 |                 |                | Weighted mode    | 34          | -0.455      | 0.707     | 0.524          |
| 62 | <i>AD</i>       | <i>HDiff</i>   | IVW              | 11          | 0.004       | 0.002     | 0.061          |
| 63 |                 |                | MR Egger         | 11          | 0.003       | 0.003     | 0.382          |
| 64 |                 |                | Simple Mode      | 11          | 0.016       | 0.008     | 0.071          |
| 65 |                 |                | Weighted median  | 11          | 0.003       | 0.002     | 0.044          |
| 66 |                 |                | Weighted mode    | 11          | 0.003       | 0.002     | 0.080          |

67

68 Key: *AD*, Alzheimer's disease; *HDiff*, Hearing difficulty; IVW, Inverse variance weighted;  
 69 MR, Mendelian randomization; SE, Standard error.

70

71 **Supplementary Table 2|**

72 Shared causal traits for Hearing difficulty and Alzheimer's disease. Two-sample Mendelian  
 73 randomization of glutamine, gamma-glutamyl glutamine, and citrate as exposure and Hearing  
 74 difficulty and Alzheimer's disease as outcome.

75

---

76

| 77 Exposure | MR method         | 78 <i>HDiff</i> |        |       |       | 79 <i>AD</i> |        |       |       |
|-------------|-------------------|-----------------|--------|-------|-------|--------------|--------|-------|-------|
|             |                   | nSNPs           | Beta   | SE    | Pval  | nSNPs        | Beta   | SE    | Pval  |
| 78 GGG      | IVW**             | 3               | -0.202 | 0.054 | 0.000 | 3            | -1.948 | 0.578 | 0.001 |
| 79 GGG      | MR Egger          | 3               | -0.197 | 0.186 | 0.482 | 3            | -2.996 | 1.993 | 0.374 |
| 80 GGG      | Simple mode       | 3               | -0.177 | 0.077 | 0.148 | 3            | -2.224 | 0.746 | 0.096 |
| 81 GGG      | Weighted median** | 3               | -0.185 | 0.063 | 0.003 | 3            | -2.060 | 0.673 | 0.002 |
| 82 GGG      | Weighted mode     | 3               | -0.181 | 0.072 | 0.129 | 3            | -2.160 | 0.782 | 0.110 |
| 83 Gln      | IVW**             | 5               | -0.017 | 0.006 | 0.006 | 5            | -0.222 | 0.069 | 0.001 |
| 84 Gln      | MR Egger          | 5               | -0.022 | 0.012 | 0.172 | 5            | -0.235 | 0.132 | 0.175 |
| 85 Gln      | Simple mode       | 5               | -0.017 | 0.012 | 0.237 | 5            | -0.235 | 0.120 | 0.122 |
| 86 Gln      | Weighted median** | 5               | -0.019 | 0.007 | 0.007 | 5            | -0.227 | 0.072 | 0.002 |
| 87 Gln      | Weighted mode     | 5               | -0.020 | 0.008 | 0.058 | 5            | -0.228 | 0.084 | 0.052 |
| 88 Citrate  | IVW**             | 4               | -0.020 | 0.008 | 0.012 | 4            | -0.207 | 0.088 | 0.018 |
| 89 Citrate  | MR Egger          | 4               | -0.034 | 0.062 | 0.639 | 4            | -0.137 | 0.684 | 0.860 |
| 90 Citrate  | Simple mode       | 4               | -0.016 | 0.014 | 0.319 | 4            | -0.204 | 0.111 | 0.165 |
| 91 Citrate  | Weighted median** | 4               | -0.018 | 0.009 | 0.047 | 4            | -0.207 | 0.103 | 0.045 |
| 92 Citrate  | Weighted mode     | 4               | -0.015 | 0.011 | 0.275 | 4            | -0.206 | 0.114 | 0.170 |

93

---

94 Key: *AD*, Alzheimer's disease; *HDiff*, Hearing difficulty; IVW, Inverse variance weighted;  
 95 Gln, glutamine; GGG, gamma-glutamyl glutamine; SE, Standard error. Beta < 0 means  
 96 negative effect/protective on the outcome (decreased glutamine, gamma-glutamylglutamine,  
 97 and citrate) and Beta > 0 means positive effect on the outcome (increased glutamine, gamma-  
 98 glutamylglutamine and citrate). \*\* MR methods that are significant for both *HDiff* and *AD* at  
 99 uncorrected P-value of 0.05

100 **Supplementary Table 3|**

101 Characteristics of genetic variants as instruments from glutamine, gamma-glutamylglutamine, and citrate GWAS with corresponding Hearing  
 102 difficulty and Alzheimer's disease GWAS data sets. The effect of assessed allele at each locus is indicated by beta.

103

| 104 | SNP              | Chr       | Nearby gene  | EA       | NEA      | EAF          | <u>Glutamine GWAS</u> |              |                 | <u>HDiff GWAS</u> |              |                | <u>AD GWAS</u> |              |              |
|-----|------------------|-----------|--------------|----------|----------|--------------|-----------------------|--------------|-----------------|-------------------|--------------|----------------|----------------|--------------|--------------|
| 105 | N=24,462         |           |              |          |          |              | Beta                  | SE           | P-value         | Beta              | SE           | P-value        | Beta           | SE           | P-value      |
| 106 | rs1260326        | 2         | GCKR*        | C        | T        | 0.638        | 0.062                 | 0.010        | 9.87E-10        | 0.002             | 0.001        | 0.13           | 8.0E-04        | 0.016        | 0.96         |
| 107 | rs6729711        | 2         | GLS          | A        | G        | 0.181        | -0.069                | 0.012        | 2.23E-08        | 0.000             | 0.002        | 0.84           | 0.011          | 0.018        | 0.54         |
| 108 | rs12306007       | 12        | SLC38A4      | T        | C        | 0.140        | 0.079                 | 0.013        | 3.63E-09        | 0.000             | 0.002        | 0.94           | -0.017         | 0.025        | 0.49         |
| 109 | <b>rs2657879</b> | <b>12</b> | <b>GLS2*</b> | <b>G</b> | <b>A</b> | <b>0.176</b> | <b>-0.221</b>         | <b>0.012</b> | <b>3.30E-70</b> | <b>-0.004</b>     | <b>0.002</b> | <b>9.6E-03</b> | <b>0.047</b>   | <b>0.021</b> | <b>0.024</b> |
| 110 | rs7078003        | 10        | HOGA1        | T        | C        | 0.195        | 0.074                 | 0.011        | 2.96E-10        | 0.001             | 0.002        | 0.48           | -0.022         | 0.023        | 0.035        |
| 111 |                  |           |              |          |          |              | <u>GGG GWAS</u>       |              |                 | <u>HDiff GWAS</u> |              |                | <u>AD GWAS</u> |              |              |
| 112 | N=7,662          |           |              |          |          |              | Beta                  | SE           | P-value         | Beta              | SE           | P-value        | Beta           | SE           | P-value      |
| 113 | rs1260326        | 2         | GCKR*        | T        | C        | 0.412        | -0.012                | 0.002        | 5.61E-09        | 0.002             | 0.001        | 0.13           | 0.001          | 0.016        | 0.96         |
| 114 | rs1751956        | 10        | LYZL1        | T        | G        | 0.864        | 0.016                 | 0.002        | 2.35E-08        | 0.000             | 0.002        | 0.94           | -0.017         | 0.025        | 0.49         |
| 115 | <b>rs2657879</b> | <b>12</b> | <b>GLS2*</b> | <b>A</b> | <b>G</b> | <b>0.826</b> | <b>0.024</b>          | <b>0.002</b> | <b>5.85E-09</b> | <b>-0.004</b>     | <b>0.002</b> | <b>9.6E-03</b> | <b>0.047</b>   | <b>0.021</b> | <b>0.024</b> |
| 116 |                  |           |              |          |          |              |                       |              |                 |                   |              |                |                |              |              |
| 117 |                  |           |              |          |          |              | <u>Citrate GWAS</u>   |              |                 | <u>HDiff GWAS</u> |              |                | <u>AD GWAS</u> |              |              |
| 118 | N=24,770         |           |              |          |          |              | Beta                  | SE           | P-value         | Beta              | SE           | P-value        | Beta           | SE           | P-value      |
| 119 | rs1468269        | 22        | GSC2         | A        | G        | 0.2613       | -0.065                | 0.011        | 5.04E-09        | 0.001             | 0.001        | 0.71           | 0.017          | 0.018        | 0.353        |
| 120 | rs172642         | 17        | SLC13A5      | C        | A        | 0.481        | -0.080                | 0.009        | 4.80E-18        | 0.001             | 0.001        | 0.34           | 0.015          | 0.014        | 0.304        |
| 121 | rs2040771        | 22        | SLC25A1      | T        | C        | 0.476        | -0.091                | 0.009        | 1.28E-22        | -0.001            | 0.001        | 0.36           | 0.019          | 0.014        | 0.192        |
| 122 | rs2921604        | 5         | ANKH         | C        | T        | 0.444        | 0.097                 | 0.094        | 3.65E-25        | 0.003             | 0.001        | 0.035          | 0.020          | 0.014        | 0.161        |

123

---

124 Key: *AD*, Alzheimer's disease; *HDiff*, Hearing difficulty; EA, effect allele; NEA, non-effect allele; GGG, gamma-glutamylglutamine; SE,  
125 Standard error; SNPs in bold are single SNP that driving the association and influencing the causal relationship using leave one out test \* Exonic  
126 SN
